# Supplementary material for: Activated basal planes of WS2 by intrinsic defects as catalysts for the electrocatalytic nitrogen reduction reaction
Source: Royal Society of Chemistry journal article supplement (doi:10.1039/c9ta10050d), 2019-01-01
Supplement: c9ta10050d1.pdf [file c9ta10050d1.pdf]

## Supporting Information

*for*

### **Activated Basal Plane of WS<sub>2</sub> by Intrinsic Defects as a Catalyst for Electrocatalytic Nitrogen Reduction Reaction**

X. Yao, Z. W. Chen, Y. R. Wang, X. Y. Lang, W. Gao, Y. F. Zhu\* and Q. Jiang\*

Key Laboratory of Automobile Materials, Ministry of Education (Jilin University),  
School of Materials Science and Engineering, Jilin University, Changchun 130022,  
China

---

\* Corresponding authors: Y. F. Zhu; Q. Jiang. Fax: 86-431-85095876.

E-mails: [yfzhu@jlu.edu.cn](mailto:yfzhu@jlu.edu.cn); [jiangq@jlu.edu.cn](mailto:jiangq@jlu.edu.cn)

## Computational details of formation energies

Our calculations give that  $E_{S(\text{single})} = -397.990901$  Ha,  $E_{W(\text{single})} = -137.310857$  Ha, and  $E_{m-W_{S_2}} = -933.7120494$  Ha. According to the relationship that  $E_{\text{Bond}} = (E_{m-W_{S_2}} - E_{W(\text{single})} - 2E_{S(\text{single})})/3$ , it gives  $E_{\text{Bond}} = -0.1397968$  Ha, and then  $E_{S_0} = -398.1306978$  Ha and  $E_{W_0} = -137.4506538$  Ha. Moreover, the  $E_{\text{defect}}$  values have been calculated to be  $-14678.5807089$  Ha for  $W_S$ ,  $-14280.4258873$  Ha for  $W_{S_2}$ ,  $-14541.2188587$  Ha for  $V_S$ , and  $-14143.0592056$  Ha for  $V_{S_2}$ . Based on the equation that  $E_f = E_{\text{defect}} - N_S \times E_{S_0} - N_W \times E_{W_0}$ , it has  $E_f = 0.1320375$ ,  $0.1561613$ ,  $0.0432339$  and  $0.0721892$  Ha for  $W_S$ ,  $W_{S_2}$ ,  $V_S$  and  $V_{S_2}$ , respectively. Namely,  $E_f = 3.59$  eV for  $W_S$ ,  $4.25$  eV for  $W_{S_2}$ ,  $1.18$  eV for  $V_S$ , and  $1.96$  eV for  $V_{S_2}$ .

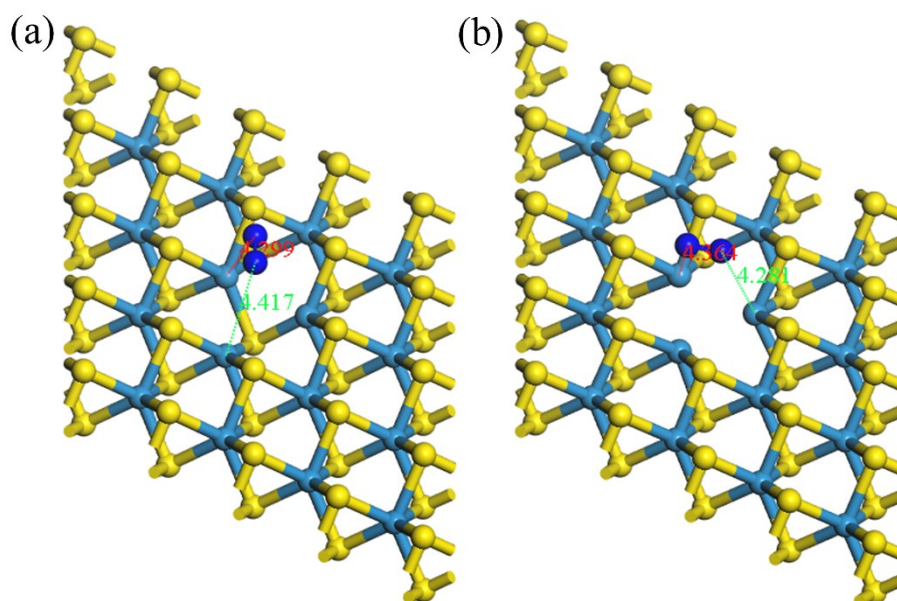

**Fig. S1** The optimized structures of  $N_2$  adsorbed on (a)  $V_S$  and (b)  $V_{S2}$ , including the nearest distances between any N atom and any exposed W atom.

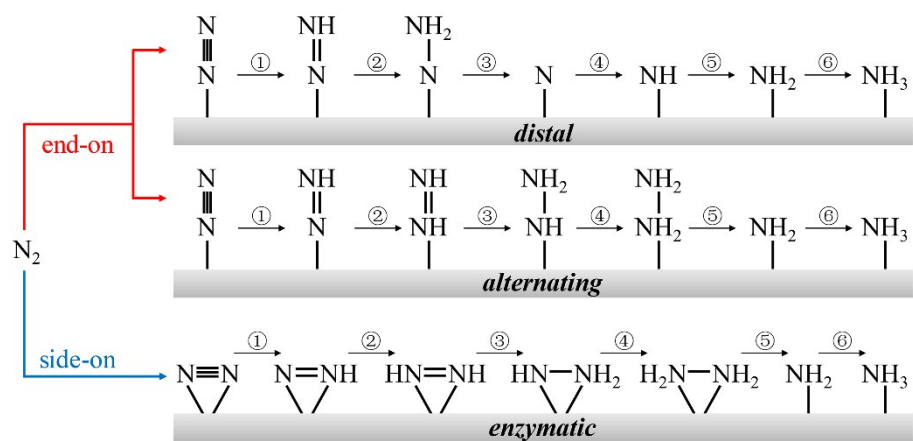

**Fig. S2** Schematic illustration of the distal, alternating, and enzymatic mechanisms for the reduction of  $N_2$  to  $NH_3$ .

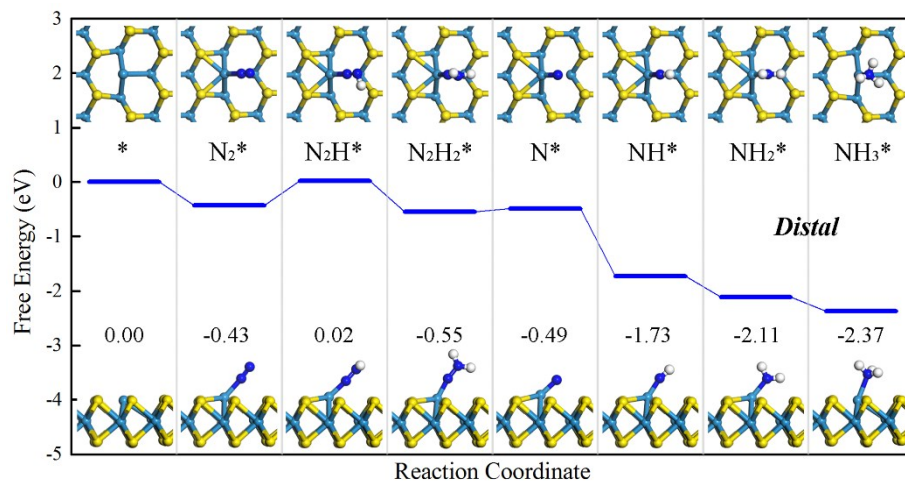

**Fig. S3** Free energy profile and the corresponding geometric structures of intermediate states of NRR on WS<sub>2</sub> at an applied potential of 0 V for the distal mechanism.

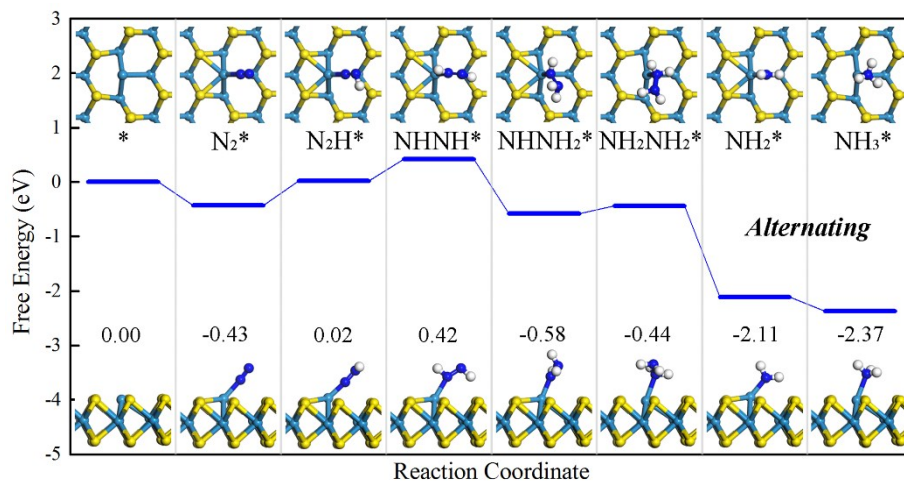

**Fig. S4** Free energy profile and the corresponding geometric structures of intermediate states of NRR on  $W_{S_2}$  at an applied potential of 0 V for the alternating mechanism.

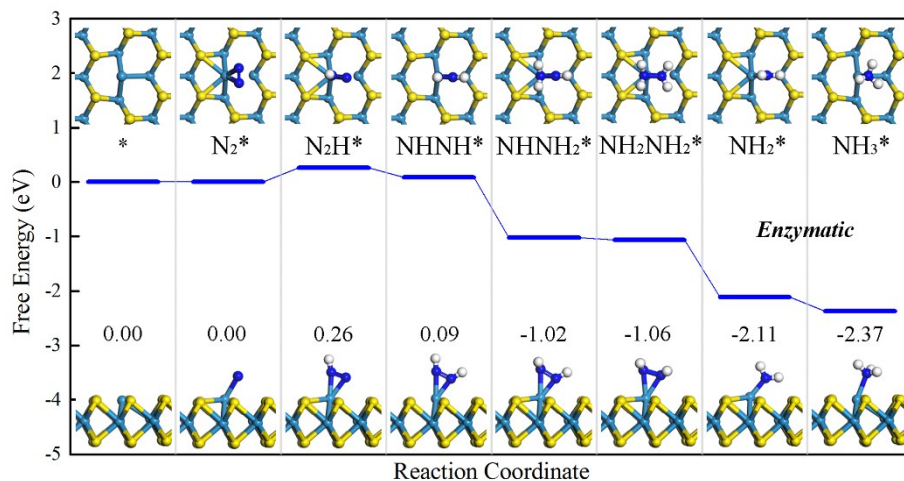

**Fig. S5** Free energy profile and the corresponding geometric structures of intermediate

states of NRR on  $W_{S_2}$  at an applied potential of 0 V for the enzymatic mechanism. <sup>a</sup>

<sup>a</sup> The adsorption of side-on adsorbed  $N_2$  on  $W_{S_2}$  ( $E_{ad} = -0.39$  eV) is weaker than that of H atom ( $E_{ad} = -0.50$  eV), suggesting that the enzymatic mechanism is significantly difficult to be present for NRR on  $W_{S_2}$ .

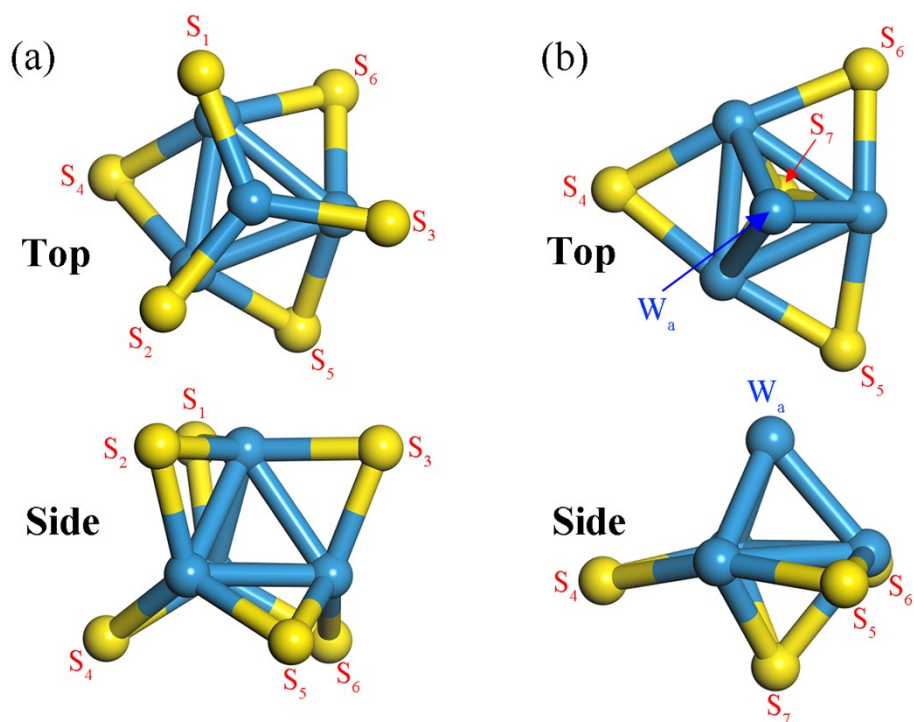

**Fig. S6** The top (the upper) and side views (the lower) of (a)  $W_4S_6$  cluster and (b)  $W_4S_4$  cluster. <sup>a</sup>

<sup>a</sup> To model the coordination environment of active  $W_0$  atom in  $W_S$ , a tetrahedron containing as least four W atoms is required. According to the literatures,<sup>1, 2</sup>  $W_4S_6$  is the most stable one among  $W_4S_x$  clusters with  $x = 1-12$ . Considering that active W atom only form bonds with W atoms while other W atoms should be bonded to as many S atoms as possible,  $S_1$ ,  $S_2$ , and  $S_3$  atoms in  $W_4S_6$  are removed and  $S_7$  atom is added to fabricate  $W_4S_4$  cluster. In addition, the active W atom ( $W_a$ ) of  $W_4S_4$  is positive with the charge of 0.28, similar to the active  $W_0$  atom (0.29) of  $W_S$ .



## References

1. P. Murugan, V. Kumar, Y. Kawazoe and N. Ota, *J. Phys. Chem. A*, 2007, **111**, 2778-2782.
2. N. Bertram, Y. D. Kim, G. Ganteför, Q. Sun, P. Jena, J. Tamuliene and G. Seifert, *Chem. Phys. Lett.*, 2004, **396**, 341-345.
